# Supplementary material for: Comparison of Distal Radial, Proximal Radial, and Femoral Access in Patients with ST-Elevation Myocardial Infarction
Source: MDPI journal article supplement (doi:10.3390/jcm10153438), 2021-08-02
Supplement: s1 [file s1]

**Supplementary Table S1. Baseline characteristics.**

| Characteristics                    | DRA<br>(n=35) | PRA<br>(n=25) | FA<br>(n=34) | <i>p</i> value |
|------------------------------------|---------------|---------------|--------------|----------------|
| Age, years                         | 60.3 ± 14.3   | 59.0 ± 13.1   | 61.5 ± 12.6  | 0.78           |
| Age ≥75 years                      | 7 (20.0)      | 4 (16.0)      | 6 (17.6)     | 0.92           |
| Male                               | 30 (85.7)     | 24 (96.0)     | 27 (79.4)    | 0.19           |
| Body mass index, kg/m <sup>2</sup> | 24.5 ± 3.2    | 26.2 ± 2.5    | 25.2 ± 5.1   | 0.23           |
| <b>Vital signs</b>                 |               |               |              |                |
| Systolic BP, mmHg                  | 127.9 ± 20.3  | 127.6 ± 25.3  | 128.7 ± 23.4 | 0.98           |
| Diastolic BP, mmHg                 | 76.0 ± 12.7   | 77.1 ± 13.3   | 70.9 ± 11.8  | 0.12           |
| Heart rate, beats per min          | 74.9 ± 15.4   | 77.5 ± 20.7   | 76.4 ± 15.3  | 0.84           |
| <b>Cardiovascular risk factors</b> |               |               |              |                |
| Hypertension                       | 13 (37.1)     | 10 (40.0)     | 16 (47.1)    | 0.69           |
| Diabetes mellitus                  | 8 (22.9)      | 6 (24.0)      | 12 (35.3)    | 0.46           |
| Current smoker                     | 15 (42.9)     | 12 (48.0)     | 13 (38.2)    | 0.75           |
| Dyslipidemia                       | 8 (22.9)      | 11 (44.0)     | 14 (41.2)    | 0.16           |
| Atrial fibrillation                | 2 (5.7)       | 4 (16.0)      | 3 (8.8)      | 0.40           |
| CKD ≥ stage 3                      | 1 (2.9)       | 3 (12.0)      | 5 (14.7)     | 0.22           |
| Prior stroke                       | 0             | 0             | 1 (2.9)      | 0.41           |

|                                          |                      |                    |                    |      |
|------------------------------------------|----------------------|--------------------|--------------------|------|
| Prior MI                                 | 0                    | 2 (8.0)            | 2 (5.9)            | 0.27 |
| Prior PCI                                | 2 (5.7)              | 4 (16.0)           | 3 (8.8)            | 0.40 |
| Prior bypass surgery                     | 0                    | 0                  | 0                  | -    |
| <b>Killip class 3/4</b>                  | 8 (22.9)             | 3 (12.0)           | 12(35.3)           | 0.28 |
| <b>LVEF, %</b>                           | 47.9 ± 10.8          | 46.6 ± 9.9         | 47.3 ± 10.9        | 0.90 |
| <b>Laboratory findings</b>               |                      |                    |                    |      |
| Hemoglobin, g/dL                         | 15.3 ±1.5            | 15.2 ± 1.4         | 14.3 ± 1.8         | 0.03 |
| Platelet count, 10 <sup>3</sup> /μL      | 236.2 ± 60.3         | 254.1 ± 90.1       | 262.1 ± 64.3       | 0.30 |
| Prothrombin time, INR                    | 0.98 ± 0.05          | 0.99 ± 0.04        | 1.02 ± 0.11        | 0.06 |
| Creatinine, mg/dL                        | 0.90 ± 0.28          | 0.97 ± 0.35        | 1.18 ± 1.55        | 0.45 |
| eGFR, ml/min/1.73 m <sup>2</sup>         | 82.5 ± 13.9          | 78.4 ± 15.8        | 75.7 ± 20.9        | 0.26 |
| Peak CK-MB, ng/ml                        | 144.5 ± 169.4        | 82.0 ± 130.0       | 173.8 ± 166.7      | 0.09 |
| Peak troponin T, pg/ml                   | 12110.3 ±<br>22596.6 | 6109.3 ±<br>3829.9 | 5110.2 ±<br>5653.9 | 0.10 |
| <b>P2Y<sub>12</sub> inhibitor before</b> |                      |                    |                    | 0.15 |
| <b>PCI</b>                               |                      |                    |                    |      |
| Clopidogrel                              | 6 (17.1)             | 1 (4.0)            | 2 (5.9)            |      |
| Ticagrelor                               | 29 (82.9)            | 24 (96.0)          | 32 (94.1)          |      |
| Prasugrel                                | 0                    | 0                  | 0                  |      |
| <b>Medications at discharge</b>          |                      |                    |                    |      |
| Aspirin                                  | 35 (100)             | 25 (100.0)         | 34 (100)           | -    |

P2Y<sub>12</sub> inhibitor

|              |           |           |           |      |
|--------------|-----------|-----------|-----------|------|
| Clopidogrel  | 6 (17.1)  | 5 (20.0)  | 7 (20.6)  | 0.93 |
| Ticagrelor   | 27 (77.1) | 20 (80.0) | 26 (76.5) | 0.95 |
| Prasugrel    | 2 (5.7)   | 0         | 1 (2.9)   | 0.46 |
| Warfarin     | 2 (5.7)   | 0         | 0         | 0.18 |
| DOAC         | 1 (2.9)   | 4 (16.0)  | 3 (8.8)   | 0.20 |
| ACEi or ARB  | 12 (34.3) | 11 (44.0) | 20 (58.8) | 0.12 |
| Beta-blocker | 21 (60.0) | 20 (80.0) | 20 (58.8) | 0.18 |
| Statin       | 35 (100)  | 25 (100)  | 34 (100)  | -    |

---

Data are presented as the mean  $\pm$  SD or number (%).

Abbreviations: DRA, distal radial access; PRA, proximal radial access; FA, femoral access; BP, blood pressure; CKD, chronic kidney disease; MI, myocardial infarction; PCI, percutaneous coronary intervention; LVEF, left ventricular ejection fraction; INR, international normalized ratio; eGFR, estimated glomerular filtration rate; CK-MB, creatinine kinase myocardial band; DOAC, direct oral anticoagulants; ACEi, angiotensin converting enzyme inhibitor; ARB, angiotensin receptor blocker.

**Supplementary Table S2. Angiographic and procedural characteristics.**

| Characteristics        | DRA<br>(n=35) | PRA<br>(n=25) | FA<br>(n=34) | <i>p</i> value |
|------------------------|---------------|---------------|--------------|----------------|
| Infarct-related artery |               |               |              | 0.38           |
| LM                     | 0             | 0             | 1 (2.9)      |                |
| LAD                    | 19 (54.3)     | 12 (48.0)     | 15 (44.1)    |                |
| LCX                    | 4 (11.4)      | 1 (4.0)       | 5 (14.7)     |                |
| RCA                    | 10 (28.6)     | 12 (48.0)     | 13 (38.2)    |                |
| Ramus intermedius      | 2 (5.7)       | 0             | 0            |                |
| CAD extent             |               |               |              | 0.11           |
| 1VD                    | 16 (45.7)     | 12 (48.0)     | 14 (41.2)    |                |
| 2VD                    | 16 (45.7)     | 6 (24.0)      | 9 (26.5)     |                |
| 3VD                    | 1 (2.9)       | 4 (16.0)      | 9 (26.5)     |                |
| LM involvement         | 2 (5.7)       | 3 (12.0)      | 2 (5.9)      |                |
| Lesion type, B2/C      | 35 (100)      | 25 (100)      | 34 (100)     | -              |
| PCI                    |               |               |              |                |
| With stenting          | 32 (91.4)     | 24 (96.0)     | 31 (91.2)    | 0.77           |
| Imaging-guided PCI     |               |               |              |                |
| IVUS                   | 8 (22.9)      | 4 (16.0)      | 6 (17.6)     | 0.28           |
| OCT                    | 7 (20.0)      | 6 (24.0)      | 2 (5.9)      |                |

|                                        |           |           |           |       |
|----------------------------------------|-----------|-----------|-----------|-------|
| Multi-vessel PCI                       | 1 (2.9)   | 0         | 2 (5.9)   | 0.44  |
| Total number of<br>implanted stents    | 1.1 ±0.5  | 1.2 ±0.6  | 1.3 ± 0.8 | 0.21  |
| Implantation of ≥2 stents              | 5 (14.3)  | 5 (20.0)  | 10 (29.4) | 0.30  |
| Thrombus aspiration                    | 19 (54.3) | 8 (32.0)  | 17 (50.0) | 0.21  |
| Temporary pacemaker                    | 0 (0)     | 1 (4.0)   | 8 (23.5)  | <0.01 |
| Glycoprotein IIb/IIIa<br>inhibitor use | 9 (25.7)  | 8 (32.0)  | 14 (41.2) | 0.39  |
| Guiding catheter                       |           |           |           |       |
| 6-Fr                                   | 27 (77.1) | 25 (100)  | 29 (85.3) |       |
| 7-Fr                                   | 7 (20.0)  | 0         | 5 (14.7)  | <0.01 |
| Sheathless                             | 1 (2.9)   | 0         | 0         |       |
| Guiding catheter                       |           |           |           |       |
| EBU or Amplatz type                    | 28 (80.0) | 15 (60.0) | 24 (70.6) | 0.24  |
| Judkins type                           | 7 (20.0)  | 10 (40.0) | 10 (29.4) |       |
| Vascular closure device<br>use         |           |           | 31 (91.2) |       |
| Perclose                               |           |           | 12 (35.3) |       |
| Femoseal                               |           |           | 18 (52.9) |       |
| Mynx grip                              |           |           | 1 (2.9)   |       |
| Manual compression                     |           |           | 3 (8.8)   |       |

|                           |              |              |              |      |
|---------------------------|--------------|--------------|--------------|------|
| Total procedure time, min | 50.2 ± 17.6  | 43.6 ± 26.1  | 55.0 ± 27.4  | 0.20 |
| Total contrast volume, cc | 234.0 ± 58.6 | 216.8 ± 92.5 | 258.2 ± 97.3 | 0.17 |

---

Data are presented as mean ± SD or number (%).

Abbreviations: DRA, distal radial access; PRA, proximal radial access; FA, femoral access; LM, left main artery; LAD, left anterior descending artery; LCX, left circumflex artery; RCA, right coronary artery; CAD, coronary artery disease; PCI, percutaneous coronary intervention; IVUS, intravascular ultrasound; OCT, optical coherence tomography.

**Supplementary Table S3. Characteristics of patients with failed DRA.**

| No. | Sex    | Age | Systolic BP,<br>mmHg | Cross-over         | Distal Radial Operator |
|-----|--------|-----|----------------------|--------------------|------------------------|
| 1   | Female | 46  | 162                  | Proximal<br>radial | Non-experienced        |
| 2   | Female | 47  | 134                  | Femoral            | Non-experienced        |
| 3   | Male   | 40  | 91                   | Femoral            | Experienced            |
| 4   | Female | 58  | 114                  | Femora             | Non-Experienced        |
| 5   | Male   | 61  | 108                  | Femoral            | Non-Experienced        |
| 6   | Male   | 50  | 98                   | Femoral            | Experienced            |
| 7   | Female | 44  | 111                  | Femoral            | Non-Experienced        |

Abbreviations: DRA, distal radial access; BP, blood pressure.
